# Supplementary material for: Preconception Exposure to Fine Particulate Matter Leads to Cardiac Dysfunction in Adult Male Offspring
Source: PubMed Central journal article supplement — J Am Heart Assoc. 2018 Dec 5;7(24):e010797. doi: 10.1161/JAHA.118.010797 (PMC6405597; doi:10.1161/jaha.118.010797), 2018-12-05

# **SUPPLEMENTAL MATERIAL**

**Figure S1. Preconception exposure model.**

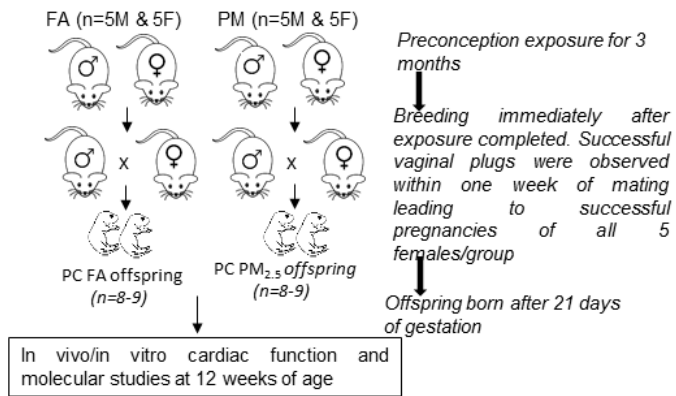

**Figure S2. Body weight parameters from mice born to preconception FA or PM<sub>2.5</sub> exposed parents.**

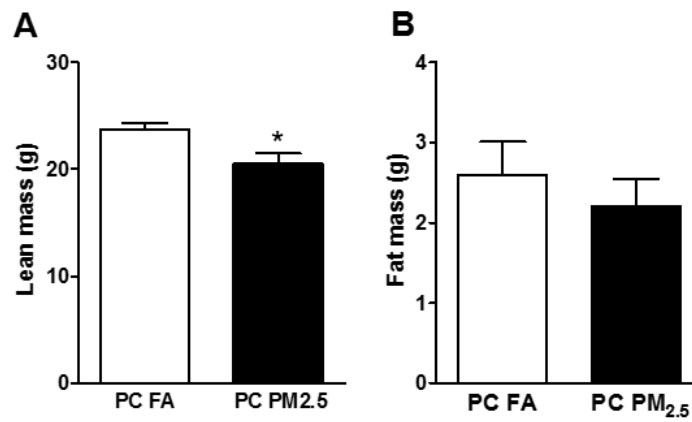

**(A)** Lean mass and **(B)** Fat mass. Data were obtained from 3-month-old mice heart (n=6 mice/group) that were born to preconception FA or PM<sub>2.5</sub> exposed parents and expressed as mean  $\pm$  S.E.M. \*p<0.05 vs PC FA controls.

Figure S3. Quantitative PCR analysis showing expression of (A) Sarco/endoplasmic reticulum  $\text{Ca}^{2+}$ -ATPase (SERCA-2A), (B) Phospholamban (PLN) and (C)  $\text{Na}^+/\text{Ca}^{2+}$  exchanger (NCX).

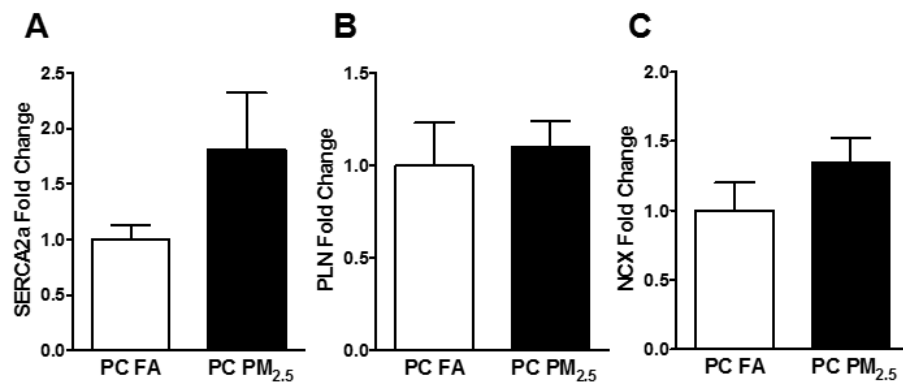

Data were obtained from 3-month-old mice heart (n=6 mice/group) that were born to preconception FA or PM<sub>2.5</sub> exposed parents and expressed as mean  $\pm$  S.E.M.

Figure S4. Quantitative PCR analysis showing expression of (A) DNA methyltransferases-1 (Dnmt1), (B) DNA methyltransferases-3a (Dnmt3a), (C) DNA methyltransferases-3b (Dnmt3b).

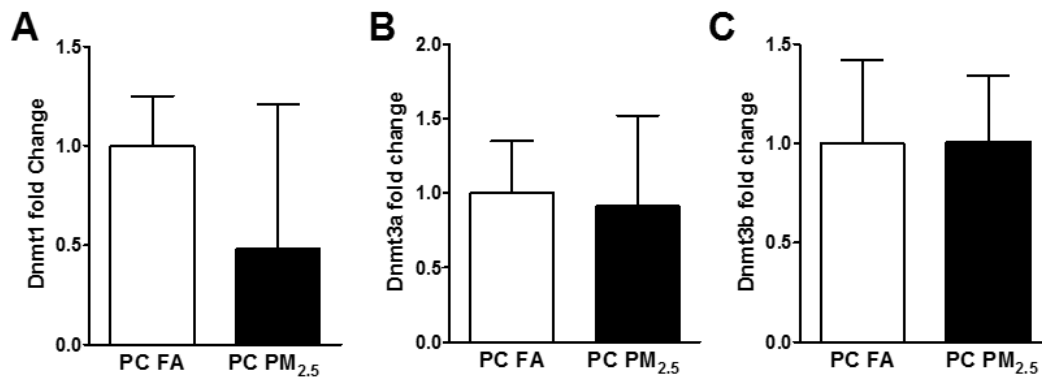

Supplement: JAH3-7-e010797-s001.pdf [file JAH3-7-e010797-s001.pdf]
